# Supplementary material for: Inhalation of welding fumes reduced sperm counts and high fat diet reduced testosterone levels; differential effects in Sprague Dawley and Brown Norway rats
Source: PubMed Central journal article supplement (PMC6954601; doi:10.1186/s12989-019-0334-0), 2020-01-10

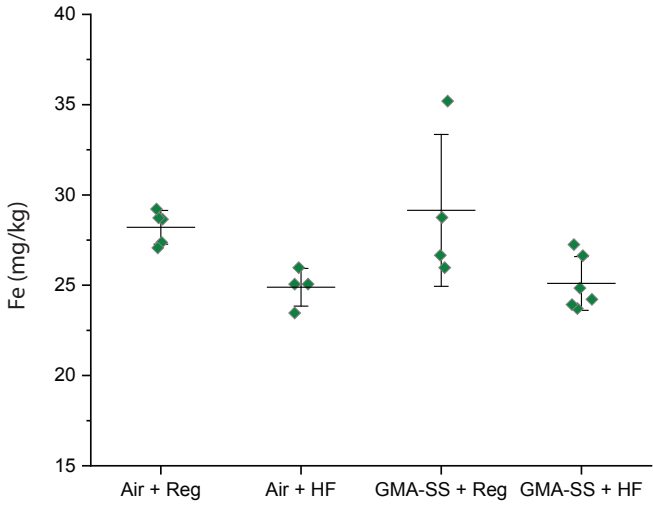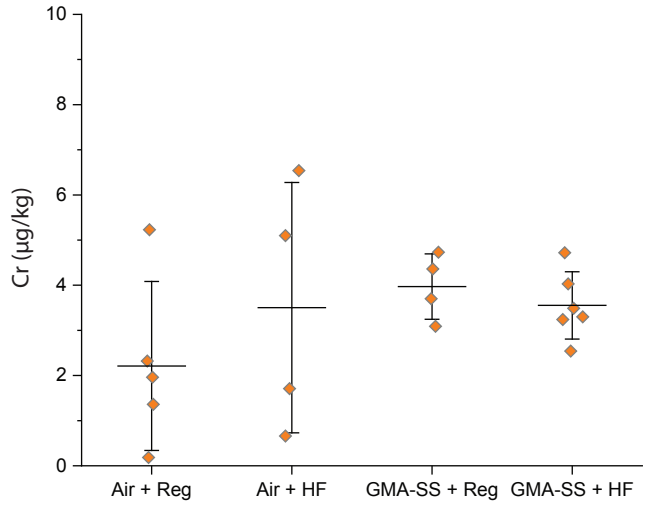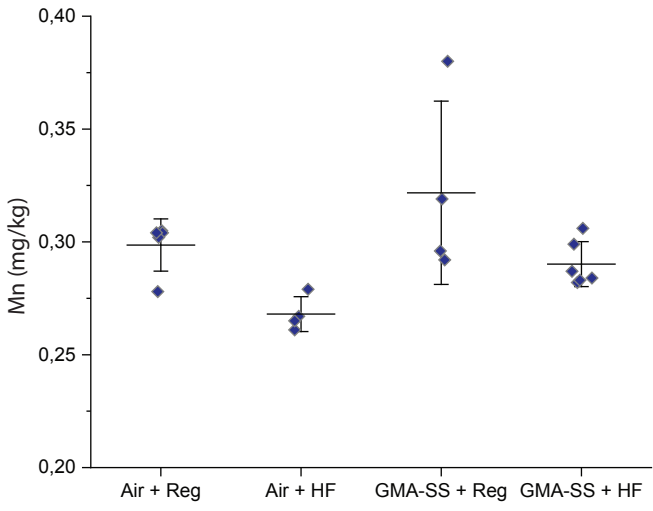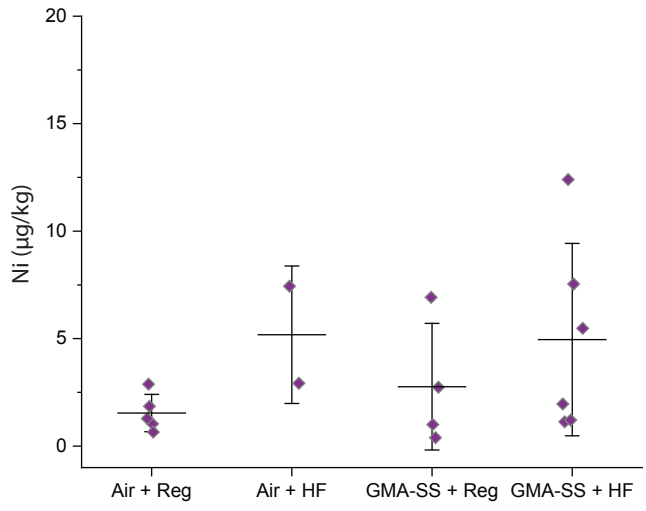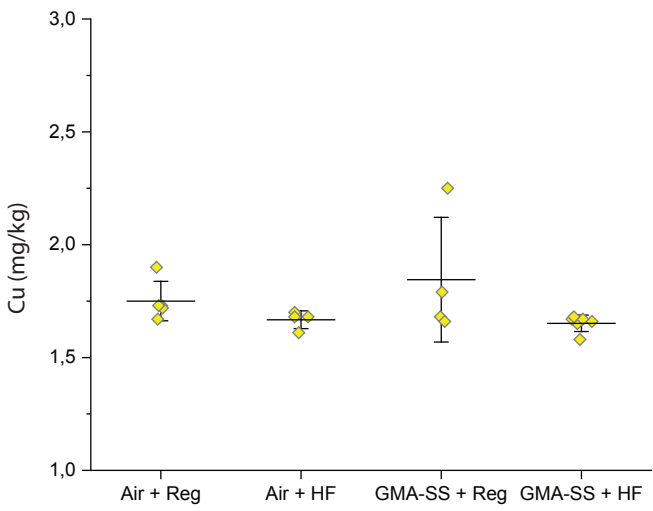

Supplement: 12989_2019_334_MOESM1_ESM.pdf [file 12989_2019_334_MOESM1_ESM.pdf]
